# Supplementary material for: Microencapsulated and Ready-to-Eat Beetroot Soup: A Stable and Attractive Formulation Enriched in Nitrate, Betalains and Minerals
Source: MDPI journal article supplement (doi:10.3390/foods12071497), 2023-04-02
Supplement: s1 [file s1]

Table S1. General beetroot soup formulation

| Ingredient    | Amount  |
|---------------|---------|
| Beetroot      | 1,764 g |
| Fresh garlic  | 22 g    |
| Garlic powder | 70 g    |
| Onion powder  | 17g     |
| Olive oil     | 15 mL   |
| Parsley       | 13 g    |
| Salt          | 10 g    |

| Table S2. ICP-OES parameters             |        |
|------------------------------------------|--------|
| ICP-OES conditions                       | Values |
| Radiofrequency power (W)                 | 1200   |
| Plasma flow (L·min <sup>-1</sup> )       | 12     |
| Auxiliary flow (L·min <sup>-1</sup> )    | 0.2    |
| Nebulizer pressure (bar)                 | 1.0    |
| Sample flow rate (mL·min <sup>-1</sup> ) | 1.0    |
| Integration time (s)                     | 1.0    |
| Resolution                               | High   |

Table S3. Elemental content in the certified reference materials, expressed as  $\text{mg}\cdot\text{kg}^{-1}$  dry weight. Recoveries (%) were calculated for each element separately.

| Reference materials ( $\text{mg}\cdot\text{kg}^{-1}$ ) |                |              |          |
|--------------------------------------------------------|----------------|--------------|----------|
| Element                                                | Reference      | Experimental | Recovery |
| Cu                                                     | $4.9\pm0.2$    | 5            | 102%     |
| K                                                      | $61000\pm2000$ | 55000        | 91%      |
| Mg                                                     | $6500\pm300$   | 6100         | 94%      |
| Mn                                                     | $21.2\pm1.0$   | 22           | 104%     |
| P                                                      | 2600           | 2150         | 83%      |
| Zn                                                     | $15.6\pm1.2$   | 13           | 83%      |

*Supplementary files S4*

Table S4. Limits of detection (LOD) and limits of quantification (LOQ) for each element determined in beetroot-soup samples

| Minerals | LOD (mg·100g <sup>-1</sup> ) | LOQ (mg·100g <sup>-1</sup> ) |
|----------|------------------------------|------------------------------|
| Cu       | 0.0051                       | 0.0017                       |
| Na       | 0.031                        | 0.099                        |
| K        | 0.014                        | 0.046                        |
| Mg       | 0.020                        | 0.066                        |
| Mn       | 0.0001                       | 0.0002                       |
| P*       | 0.0025                       | 0.0008                       |
| Zn       | 0.0002                       | 0.0002                       |

Table S5. Proximate composition of lyophilized beetroot soup formulations (100 g)

|                          | Pure beetroot-soup       | Beetroot-soup in starch<br>(1:2) | Beetroot-soup in<br>maltodextrin (1:2) |
|--------------------------|--------------------------|----------------------------------|----------------------------------------|
| Ashes (%)                | 7.27±0.86 <sup>a</sup>   | 2.22±0.44 <sup>b</sup>           | 1.83±0.37 <sup>b</sup>                 |
| Moisture (%)             | 4.50±0.34 <sup>a</sup>   | 3.15±0.81 <sup>b</sup>           | 4.65±0.53 <sup>a</sup>                 |
| Energy (kcal)            | 353.01±2.35 <sup>b</sup> | 383.07±2.12 <sup>a</sup>         | 384.64±1.77 <sup>a</sup>               |
| Carbohydrate (g)         | 71.70±0.97 <sup>b</sup>  | 88.40±0.77 <sup>a</sup>          | 89.20±0.79 <sup>a</sup>                |
| Protein (g)              | 3.92±0.26 <sup>a</sup>   | 1.95±0.28 <sup>b</sup>           | 1.91±0.13 <sup>b</sup>                 |
| Lipid (g)                | 5.41±1.11 <sup>a</sup>   | 2.27±0.82 <sup>b</sup>           | 2.19±0.75 <sup>b</sup>                 |
| Total dietary fibers (g) | 6.35±0.22 <sup>a</sup>   | 3.57±0.37 <sup>b</sup>           | 3.40±0.36 <sup>b</sup>                 |
| Total sugars (g)         | 21.31±1.24 <sup>a</sup>  | 10.82±1.19 <sup>b</sup>          | 12.55±1.39 <sup>b</sup>                |
| Fructose (g)             | 1.55±0.53 <sup>a</sup>   | 0.68±0.55 <sup>b</sup>           | 0.97±0.33 <sup>b</sup>                 |
| Glucose (g)              | 3.14±0.61 <sup>a</sup>   | 1.48±0.44 <sup>b</sup>           | 1.98±0.28 <sup>b</sup>                 |
| Sucrose (g)              | 16.62±1.15 <sup>a</sup>  | 8.66±1.10 <sup>b</sup>           | 9.60±1.07 <sup>b</sup>                 |

Values expressed as means ± standard deviation (n= 3). Different letters in the columns indicate statistically significant differences between samples (p<0.05).

Supplementary files S6

Table S6. Microbiological analyzes of powdered beetroot-soup: pure soup, soup microencapsulated in starch or maltodextrin at the ratio 1:2 (w/w)

| Microbiological analyses                        | Time (days) |         |         |         |         |         |                       |         |         |                       |                       |                       | Limits established by Brazilian current legislation |
|-------------------------------------------------|-------------|---------|---------|---------|---------|---------|-----------------------|---------|---------|-----------------------|-----------------------|-----------------------|-----------------------------------------------------|
|                                                 | 0           |         |         | 30      |         |         | 60                    |         |         | 90                    |                       |                       |                                                     |
|                                                 | PBS         | BSA     | BSM     | PBS     | BSA     | BSM     | PBS                   | BSA     | BSM     | PBS                   | BSA                   | BSM                   |                                                     |
| <i>Bacillus cereus</i> (CFU·g <sup>-1</sup> )   | Absence     | Absence | Absence | Absence | Absence | Absence | Absence               | Absence | Absence | Absence               | Absence               | Absence               | 3x10 <sup>3</sup> CFU·g <sup>-1</sup>               |
| <i>Salmonella sp.</i> (25 g)                    | Absence     | Absence | Absence | Absence | Absence | Absence | Absence               | Absence | Absence | Absence               | Absence               | Absence               | Absence                                             |
| <i>Esherichia coli</i> (MPN·g <sup>-1</sup> )   | Absence     | Absence | Absence | Absence | Absence | Absence | Absence               | Absence | Absence | Absence               | Absence               | Absence               | < 0.3 MPN·g <sup>-1</sup>                           |
| Total coliforms (MPN·g <sup>-1</sup> )          | Absence     | Absence | Absence | Absence | Absence | Absence | Absence               | Absence | Absence | Absence               | Absence               | Absence               | 1x10 <sup>2</sup> MPN·g <sup>-1</sup>               |
| Thermotolerant coliforms (MPN·g <sup>-1</sup> ) | Absence     | Absence | Absence | Absence | Absence | Absence | Absence               | Absence | Absence | Absence               | Absence               | Absence               | 1x10 <sup>2</sup> MPN·g <sup>-1</sup>               |
| Molds and Yeasts (CFU·g <sup>-1</sup> )         | Absence     | Absence | Absence | Absence | Absence | Absence | 2.7 x 10 <sup>3</sup> | Absence | Absence | 4.5 x 10 <sup>3</sup> | 1.1 x 10 <sup>2</sup> | 1.4 x 10 <sup>2</sup> | -                                                   |

PBS. Pure beetroot soup; BSA, beetroot soup microencapsulated in starch; BSM, beetroot soup microencapsulated in maltodextrin; CFU·g<sup>-1</sup>, colony forming units per gram; MPN·g<sup>-1</sup>, most likely number per gram of powdered beetroot soup. Limits established by the current Brazilian legislation Resolution No. 331, of December 23, 2019[42].
